# Supplementary material
Source: HighWire-hosted journal article supplement (https://www.g3journal.org/content/suppl/2016/10/31/g3.116.036137)
Supplement: FigureS4.pdf [file FigureS4.pdf]

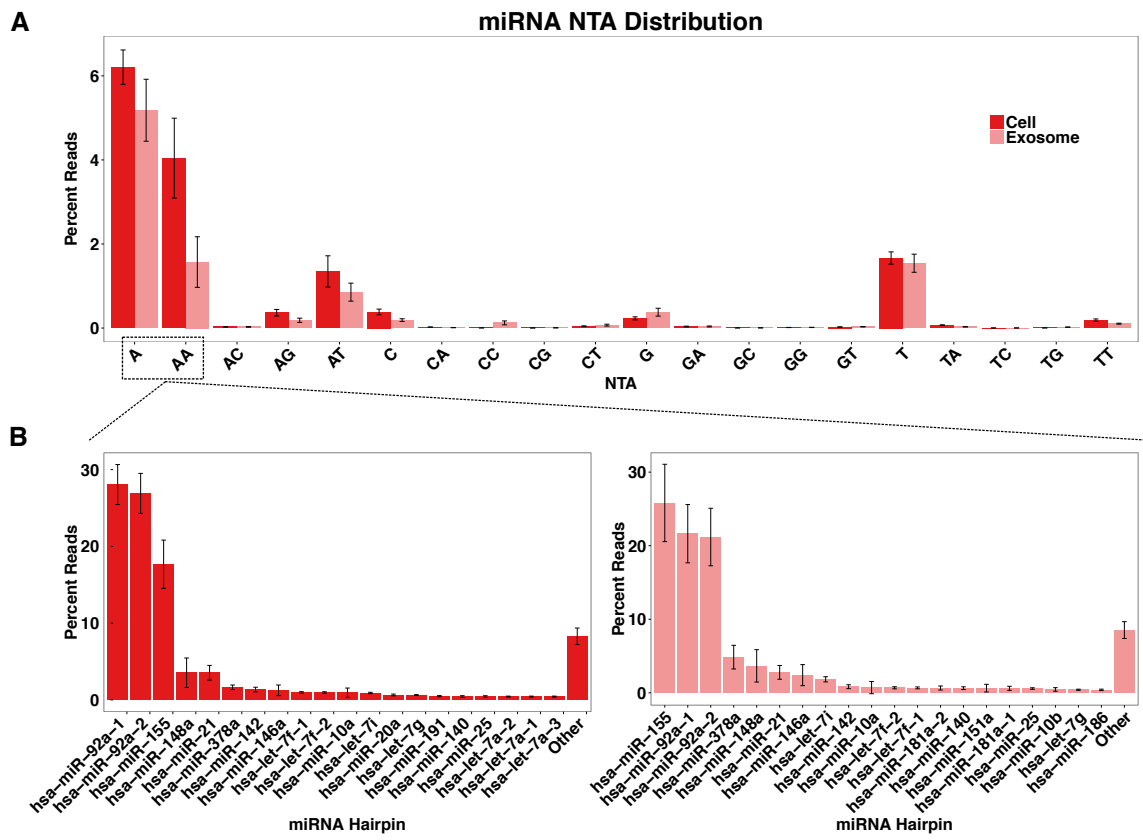

**Figure S4. miRNA 3'-NTA distributions are largely driven by extensive modification of a small subset of miRNAs.** (A) Distribution of 3'-NTAs as a percentage of all reads mapped to miRBase. On average, ~80% of all reads match the reference exactly. (B) The miRNA hairpin composition, in percentages, of all “-A” and “-AA” NTA reads. In all plots, bars show the mean of the 17 individuals and error bars indicate the standard deviation. Though some 3'-NTAs appear differentially represented in exosomes compared to cells (e.g. “-AA”), these effects are mainly driven by the extensive modification of a small number of miRNAs (for instance, those originating from hsa-miR-92a and hsa-miR-155) rather than widespread modification of many different miRNAs.
